1     **Kinetics and correlates of the neutralizing antibody response to SARS-CoV-2**

2     Kanika Vanshylla<sup>1</sup>, Veronica Di Cristanziano<sup>1,2</sup>, Franziska Kleipass<sup>1</sup>, Felix Dewald<sup>1</sup>, Philipp  
3     Schommers<sup>1,2,3</sup>, Lutz Gieselmann<sup>1,2</sup>, Henning Gruell<sup>1,2</sup>, Maike Schlotz<sup>1</sup>, Meryem S  
4     Ercanoglu<sup>1</sup>, Ricarda Stumpf<sup>1</sup>, Petra Mayer<sup>1</sup>, Eva Heger<sup>1</sup>, Wibke Johannis<sup>4</sup>, Carola Horn<sup>3</sup>,  
5     Isabelle Suárez<sup>2,3</sup>, Norma Jung<sup>3</sup>, Susanne Salomon<sup>1</sup>, Kirsten Alexandra Eberhardt<sup>5</sup>, Gerd  
6     Fätkenheuer<sup>2,3</sup>, Nico Pfeifer<sup>6,7,8</sup>, Ralf Eggeling<sup>6</sup>, Max Augustin<sup>3</sup>, Clara Lehmann<sup>2,3,9</sup>, Florian  
7     Klein<sup>1,2,9</sup>.

8     <sup>1</sup>Institute of Virology, Faculty of Medicine and University Hospital of Cologne, University of Cologne,  
9     50931 Cologne, Germany

10    <sup>2</sup>German Center for Infection Research, Partner Site Bonn-Cologne, 50931 Cologne, Germany

11    <sup>3</sup>Department I of Internal Medicine, Faculty of Medicine and University Hospital Cologne, University of  
12    Cologne, 50937 Cologne, Germany

13    <sup>4</sup>Institute for Clinical Chemistry, Faculty of Medicine and University Hospital Cologne, University of  
14    Cologne, Cologne, Germany

15    <sup>5</sup>Department of Tropical Medicine, Bernhard Nocht Institute for Tropical Medicine and Department of  
16    Medicine, University Medical Center Hamburg-Eppendorf, 20359 Hamburg, Germany

17    <sup>6</sup>Methods in Medical Informatics, Department of Computer Science, University of Tuebingen, 72076  
18    Tuebingen, Germany

19    <sup>7</sup>Faculty of Medicine, University of Tuebingen, 72076 Tuebingen, Germany

20    <sup>8</sup>German Center for Infection Research, Partner Site Tuebingen, 72076 Tuebingen, Germany

21    <sup>9</sup>Center for Molecular Medicine Cologne (CMMC), University of Cologne, 50931 Cologne, Germany

22

23

24 **Abstract**

25 A detailed understanding of antibody-based SARS-CoV-2 immunity has critical implications  
26 for overcoming the COVID-19 pandemic and for informing on vaccination strategies. In this  
27 study, we evaluated the dynamics of the SARS-CoV-2 antibody response in a cohort of 963  
28 recovered individuals over a period of 10 months. Investigating a total of 2,146 samples, we  
29 detected an initial SARS-CoV-2 antibody response in 94.4% of individuals, with 82% and  
30 79% exhibiting serum and IgG neutralization, respectively. Approximately 3% of recovered  
31 patients demonstrated exceptional SARS-CoV-2 neutralizing activity, defining them as 'elite  
32 neutralizers'. These individuals also possessed effective cross-neutralizing IgG antibodies to  
33 SARS-CoV-1 without any known prior exposure to this virus. By applying multivariate  
34 statistical modeling, we found that sero-reactivity, age, time since disease onset, and fever  
35 are key factors predicting SARS-CoV-2 neutralizing activity in mild courses of COVID-19.  
36 Investigating longevity of the antibody response, we detected loss of anti-spike reactivity in  
37 13% of individuals 10 months after infection. Moreover, neutralizing activity had an initial half-  
38 life of 6.7 weeks in serum versus 30.8 weeks in purified IgG samples indicating the presence  
39 of a more stable and long-term memory IgG B cell repertoire in the majority of individuals  
40 recovered from COVID-19. Our results demonstrate a broad spectrum of the initial SARS-  
41 CoV-2 neutralizing antibody response depending on clinical characteristics, with antibodies  
42 being maintained in the majority of individuals for the first 10 months after mild course of  
43 COVID-19.

44

45 **Main**

46 COVID-19 is caused by the severe acute respiratory syndrome coronavirus 2 (SARS-CoV-2),  
47 which was first identified in December 2019<sup>1,2</sup>. Since then, the virus has rapidly spread  
48 across the globe and caused more than 90 million proven infections and over 2 million  
49 deaths. Disease severity ranges from asymptomatic infection to symptoms like cough, fever,  
50 muscle pain, and diarrhea to severe courses of infection including pneumonia with severe  
51 respiratory distress and a high risk of death<sup>3-5</sup>. While the majority of infected individuals  
52 experience a mild course of disease, elderly or individuals with pre-existing conditions are at  
53 higher risk for severe courses of COVID-19<sup>6</sup>. In symptomatic non-hospitalized cases, the  
54 acute course of disease typically spans 7-14 days<sup>7,8</sup>. However, a significant fraction of  
55 COVID-19 patients suffer long-lasting symptoms post recovery, so called 'post-COVID  
56 syndrome'<sup>9-11</sup> (Augustin *et al.*, submitted).

57 SARS-CoV-2 infects human cells by using the virus spike (S) protein<sup>12</sup> for targeting the  
58 angiotensin converting enzyme-2 (ACE-2) receptor<sup>13</sup>. The S-protein carries dominant  
59 epitopes against which humoral B and T cell responses are generated upon natural infection  
60 and vaccination<sup>14-18</sup>. Spike-specific IgM, IgA, and IgG antibodies are detected early after  
61 infection<sup>19,20</sup> and IgG antibody levels and IgG memory B cells can persist post infection<sup>21</sup>.

62 Neutralizing antibodies (NAbs) are powerful molecules that target viruses and block infection.  
63 Moreover, they can eliminate circulating viruses and infected cells by antibody-mediated  
64 effector functions<sup>22,23</sup>. As a result, NAbs are crucial to overcome infectious diseases and are  
65 an important correlate of protection<sup>24</sup>. For SARS-CoV-2, vaccine induced NAbs as well as  
66 purified IgGs from convalescent animals have been shown to protect non-human primates  
67 (NHPs) from infection in a SARS-CoV-2 challenge model<sup>25,26</sup>. Moreover, highly potent  
68 monoclonal NAbs have been isolated<sup>27-29</sup> and are being used for treatment of COVID-19 in  
69 humans<sup>30,31</sup>.

70 Given the short time SARS-CoV-2 has been studied, information on long-term antibody  
71 dynamics are limited. Recent studies show that serum neutralizing activity is detectable

72 within a week after onset of symptoms<sup>32,33</sup> and can persist for the first months after  
73 infection<sup>21,23,34</sup>. Moreover, studies with symptomatic and hospitalized individuals have shown  
74 that more severe courses of disease result in a stronger SARS-CoV-2 neutralizing antibody  
75 response<sup>14,35,36</sup>. While these studies provide important insights, a precise quantification of  
76 SARS-CoV-2 neutralizing activity and dynamics as well as clinical correlates of developing a  
77 protective antibody response are largely unknown.

78 In this study, we set out to provide a deeper understanding of the neutralizing antibody  
79 response to SARS-CoV-2. To this end, we determined neutralizing serum and IgG activity of  
80 2,146 samples from a longitudinally monitored cohort of 963 individuals over time together  
81 with detailed information on the course of disease and past medical history. We combined  
82 statistical modeling to infer antibody decay rates after SARS-CoV-2 infection and built a  
83 prediction model for evaluating how clinical or disease features correlate with NAb titers.  
84 Finally, we performed longitudinal analyses to study anti-spike antibody levels as well as  
85 NAb titers for a time period of up to 10 months post SARS-CoV-2 infection. Our results  
86 inform on the kinetics, longevity and features affecting the antibody response to SARS-CoV-  
87 2. They are critical to understand SARS-CoV-2 immunity and to guide non-pharmacological  
88 interventions and vaccination strategies to overcome COVID-19<sup>37</sup>.

89

90

## 91 **Results**

### 92 **Establishing a cohort for investigating SARS-CoV-2 immunity**

93 To investigate the development of SARS-CoV-2 immunity, we established a cohort of  
94 COVID-19 patients who recently recovered from SARS-CoV-2 infection. Time since disease  
95 onset was derived from self-reported symptom onset or date of positive naso-/oro-  
96 pharyngeal swab. In addition, each participant reported details on the course of infection,  
97 symptoms, and past medical history (**Supplementary Table 1**). Participants enrolled ranged  
98 from 18-79 years of age (median: 44 years) with a balanced distribution of males (46.1%)  
99 and females (53.9%). Disease severity included asymptomatic (4.6%), mildly symptomatic  
100 (91.69%), and hospitalized individuals (2.6%; **Fig. 1, Supplementary Table 1**). 23.4% of  
101 participants reported pre-existing conditions that have been described to influence COVID-19  
102 outcomes<sup>6</sup>.

103 Blood samples were collected from 963 individuals at study visit 1 (median 7.3 weeks post  
104 disease onset) with follow up analyses at study visit 2 for 616 participants (median 18.8  
105 weeks post disease onset), study visit 3 for 430 participants (median 30.1 weeks post  
106 disease onset), and study visit 4 for 137 participants (median 37.9 weeks post disease onset;  
107 **Fig. 1**). Other participants were lost in follow-up or did not reach the respective study visit at  
108 the time of our analysis. Anti-spike IgG was quantified by ELISA and chemiluminescent  
109 immunoassays (CLIA) and the NAb response to SARS-CoV-2 was analyzed using both  
110 serum dilutions as well as purified IgG to precisely quantify neutralizing activity (**Extended**  
111 **Data Fig. 1**). In total, 4,516 measurements were collected for visit 1 with another 1,867  
112 subsequent measurements for visit 2-4 to determine the SARS-CoV-2 antibody response for  
113 10 months following infection.

114

115

116

## 117 **Broad spectrum of the initial SARS-CoV-2 neutralizing antibody response**

118 NAb levels were quantified by testing serum and purified IgG from plasma/serum against  
119 pseudovirus particles expressing the Wuhan01 spike protein (EPI\_ESL406716). Serum  
120 neutralization at study visit 1 was categorized based on titer into non- ( $ID_{50} < 10$ ), low-  
121 ( $ID_{50} = 10-25$ ), average- ( $ID_{50} = 25-250$ ), high- ( $ID_{50} = 250-2500$ ), and elite-neutralizers  
122 ( $ID_{50} > 2500$ ; **Fig. 2a**). Mean serum  $ID_{50}$  titer was 111.3 with 17.7% of individuals that did not  
123 reach 50% neutralization at the lowest serum dilution of 1:10. In addition, all samples were  
124 purified for IgG and the neutralizing response was determined and categorized based on  $IC_{50}$   
125 values into non- ( $IC_{50} > 750 \mu\text{g/ml}$ ), low- ( $IC_{50} = 500-750 \mu\text{g/ml}$ ), average- ( $IC_{50} = 100-500$   
126  $\mu\text{g/ml}$ ), high- ( $IC_{50} = 20-100 \mu\text{g/ml}$ ), and elite-neutralization ( $IC_{50} < 20 \mu\text{g/ml}$ ; **Fig. 2b**). At  
127 study visit 1, out of 963 participants, 10%, 44.8%, and 20% demonstrated low, average, and  
128 high neutralization, respectively. 21% did not mount an IgG neutralizing response of an  $IC_{50}$   
129 below 750  $\mu\text{g/ml}$ . 3.3% of individuals were classified as 'elite neutralizers' with  $IC_{50}$  values as  
130 low as 0.7  $\mu\text{g/ml}$  detected in one individual at 8.6 weeks post disease onset. Combining  
131 serum and IgG measurements, 87.3 % individuals showed detectable NAb activity at median  
132 7.3 weeks after SARS-CoV-2 infection (**Fig. 2c**). The serum and IgG neutralization potency  
133 categorization matched for most individuals with a high correlation between serum  $ID_{50}$  titers  
134 and IgG  $IC_{50}$  values (spearman  $r = -0.72$ ,  $p < 0.0001$ ; **Fig. 2c**). Moreover, only 5% samples  
135 had only serum and no IgG neutralization indicating that IgG antibodies forms the dominant  
136 NAb isotype in serum. To further determine the predictive value of IgG binding to the S  
137 protein for SARS-CoV-2 neutralization, we performed an S1-reactive ELISA (Euroimmun) on  
138 all samples of visit 1. 82.8% and 70.2% of individuals possessed spike-reactive IgG (**Fig. 2d,**  
139 **e**) and IgA Abs, respectively (**Fig. 2d and Extended Data Fig. 2a**). Anti-spike IgG levels  
140 were directly proportional to IgG NAb  $IC_{50}$  values (spearman  $r = -0.62$ ,  $p < 0.0001$ ; **Fig. 2f**)  
141 and IgG Ab levels better correlated with serum neutralization than IgA Ab levels (**Extended**  
142 **Data Fig. 2c, d**).

143 Finally, we determined the fraction of individuals lacking any detectable antibody response.  
144 To this end, we combined the results of different IgG and IgA assays detecting binding to  
145 SARS-CoV-2 S1, S1/S2, and N as well as three neutralization assays (**Fig. 2g**). Out of the  
146 166 anti-S1-IgG negative (12.7%) or equivocal (4.6%) individuals, we found binding  
147 antibodies in 62.0% in at least one of four assays and neutralizing activity in 54.2% in at least  
148 one of three assays (**Fig. 2g, h**). Combining these results and accounting for assay-  
149 specificity (see methods) we show that only 5.6%-7.3% of individuals do not mount a  
150 detectable antibody response against SARS-CoV-2. Notably, while only 3.6% (1 of 28) of  
151 hospitalized patients and 4.9% (43 of 877) of individuals with mild symptoms lacked anti-  
152 SARS-CoV-2 antibodies, 22.7% (10 of 44) asymptomatic individuals were negative for a  
153 detectable antibody response in at visit 1. We conclude that 92.7-94.4% of individuals  
154 naturally infected with SARS-CoV-2 mount an antibody response against the virus within the  
155 first 12 weeks. Among those, we detected a broad variation in neutralizing activity with  
156 approximately 3% generating a highly potent serum and IgG NAb response.

157

### 158 **Sero-reactivity, age, and disease severity predict SARS-CoV-2 neutralization**

159 Next, we analyzed how age, disease severity, gender, and the presence of pre-existing  
160 conditions correlate with the anti-spike antibody and SARS-CoV-2 neutralizing response  
161 (**Fig. 3a, Extended Data Fig. 3**). The IgG NAb response was significantly higher in older  
162 individuals ( $p < 0.0001$ ), with participants  $>60$  years comprising 7.7% of elite- and 42.8% of  
163 high-neutralizers (**Fig. 3a**). Hospitalized patients and individuals with symptoms had  
164 significantly higher NAb activity ( $p = 0.0008$  and  $0.0003$ ) compared to asymptomatic  
165 individuals, of which 43.2% (25 of 44) lacked detectable IgG NAbs (**Fig. 3a**). Males showed  
166 higher SARS-CoV-2 neutralization than females (GeoMean  $IC_{50}$  136.3  $\mu\text{g/ml}$  vs. 188.4  $\mu\text{g/ml}$ ;  
167  $p < 0.0001$ ). In addition, individuals with pre-existing conditions had slightly higher NAb  
168 activity compared to those without them (GeoMean  $IC_{50}$  161.9  $\mu\text{g/ml}$  vs. 174.6  $\mu\text{g/ml}$ ;  $p =$   
169 0.022; **Fig. 3a**). Similar to IgG NAb activity, serum neutralizing activity and anti-spike

170 antibodies were also higher in older individuals, patients with a more severe course of  
171 disease, and males (**Extended Data Fig. 3a-c**). Next, we performed a multivariate statistical  
172 analysis to determine the interplay between clinical features and the NAb response. Features  
173 included gender, age, disease severity, presence of pre-existing conditions, disease  
174 symptoms (**Supplementary Table 1**), weeks since disease onset, and the anti-spike IgG/IgA  
175 ELISA measurements. We applied a stepwise regression that adds new features only if they  
176 significantly improved the model according to a likelihood ratio test. The resulting  $IC_{50}$   
177 prediction model (Adjusted  $R^2 = 0.461$ ) revealed that IgG antibody levels are most predictive  
178 for SARS-CoV-2 neutralizing activity ( $p = 10^{-99}$ ), followed by age ( $p = 6.1 \cdot 10^{-7}$ ), IgA antibody  
179 levels ( $p = 7.6 \cdot 10^{-6}$ ), time since disease onset ( $p = 0.01$ ) and fever during infection ( $p = 0.02$ ;  
180 **Fig. 3b, c**). Similarly, age, anti-spike antibody levels, times since disease onset and fever  
181 during acute infection were also found to be highly predictive of serum  $ID_{50}$  (**Extended Data**  
182 **Fig. 4a, 4b**). Additionally, we built a Bayesian network model to determine the feature  
183 dependencies and how they predict the SARS-CoV-2 IgG neutralizing response (**Fig. 3d**).  
184 When applying the stepwise regression model only for predicting the presence of anti-spike  
185 antibodies, we observed that gender (IgG  $p = 8.5 \cdot 10^{-5}$ ; IgA  $p = 2.2 \cdot 10^{-10}$ ) and the disease  
186 symptoms, cough (IgA  $p = 0.01$ ), diarrhea (IgG  $p = 0.02$ ) or change in taste (IgG  $p = 0.002$ ;  
187 IgA  $p = 0.04$ ) are predictive of anti-spike antibody levels (**Extended Data Fig. 4b, c**). In  
188 addition, we investigated the possible effect of viral load obtained from naso-/oro-pharyngeal  
189 swabs at the time of diagnosis on the antibody response at study visit 1, but no correlation  
190 was found (**Extended Data Fig. 4d, e**). In summary, higher IgG levels, older age and fever  
191 during acute infection are highly predictive of the development of SARS-CoV-2 neutralizing  
192 activity.

193

#### 194 **Elite SARS-CoV-2 neutralizers exhibit SARS-CoV-1 cross-neutralization**

195 Individuals mounting a highly potent neutralizing antibody response are often considered  
196 'elite neutralizers'<sup>38</sup>. These individuals are of particular interest i.) to identify factors



197 associated with the development of effective humoral immunity, ii.) to guide vaccine design,  
198 and iii.) to isolate highly potent neutralizing monoclonal antibodies<sup>39</sup>. In order to characterize  
199 the small fraction of SARS-CoV-2 elite neutralizers in our cohort (3%;  $IC_{50} < 20 \mu\text{g/ml}$ ; **Fig.**  
200 **2b**), we selected 15 individuals of each group of non, low, average, high and elite-  
201 neutralizers (**Extended Data Fig. 5a-c**) testing them against authentic SARS-CoV-2 as well  
202 as SARS-CoV-1 pseudovirus. Neutralization of SARS-CoV-2 pseudovirus against authentic  
203 virus correlated closely in all groups with authentic virus (spearman  $r = 0.79$ ; **Extended data**  
204 **Fig. 5d**). SARS-CoV-1 neutralization was not observed in non- and low-neutralizers and only  
205 in 1 out of 15 average neutralizers. However, in the high and elite neutralizing groups, 8/15  
206 and 15/15 samples carried SARS-CoV-1 cross-neutralizing activity, respectively, with  
207 potencies ( $IC_{50}$ ) as low as  $5.1 \mu\text{g/ml}$  IgG. Of note, while all SARS-CoV-2 elite neutralizers  
208 demonstrated SARS-CoV-1 cross-neutralization, variation in potency is ranging from  $12.1 -$   
209  $634.9 \mu\text{g/ml}$  and an overall low correlation (spearman  $r = 0.3745$ ; **Fig. 4b**). Next, we studied  
210 the neutralizing potency of the elite neutralizers against six different SARS-CoV-2 strains  
211 carrying several mutations that became prominent at a global level<sup>40</sup> (**Fig. 4c, Extended**  
212 **Data Fig. 5**). IgG from elite neutralizers was potent against all tested SARS-CoV-2 strains  
213 including both S1 and S2 mutants as well as variants (BAVP1, DRC94) carrying the D614G  
214 mutation (**Fig. 4c, Extended Data Fig. 5**). We conclude, that individuals mounting a potent  
215 SARS-CoV-2 NAb response possess cross-reactive antibodies against SARS-CoV-1 without  
216 any known prior exposure and are effective in neutralizing various prevalent SARS-CoV-2  
217 strains.

218

### 219 **Long-term persistence of IgG NAbs after SARS-CoV-2 infection**

220 In order to study antibody kinetics, we first investigated the development of SARS-CoV-2-  
221 directed antibodies in the first 4 weeks after disease onset. To this end, we evaluated 259  
222 samples obtained from an additional 110 individuals. In this subgroup, 44.5% and 54.5%  
223 were male and female, respectively, and 41.8% had been hospitalized (**Extended Data Fig.**

224 **6a**). Anti-spike IgG and IgA could be detected in some people within the first week after  
225 disease onset, with IgA levels starting to decline by week 4 (**Extended Data Fig. 6b**). Out of  
226 the 24 individuals that were closely monitored, most individuals sero-converted between 2-3  
227 weeks post disease onset (**Extended Data Fig. 6b**).

228 In order to assess longevity of humoral immunity following SARS-CoV-2 infection, we applied  
229 a linear regression mixed effects model to antibody measurements obtained between 3.1 to  
230 41.9 weeks post infection. The half-life of anti-spike IgG was estimated to be 34.9 weeks  
231 (**Fig. 5a**). For systematic tracking of the antibody response within individuals, we analyzed  
232 anti-spike antibodies in 131 individuals at 4 study visits (range 3.1 to 38.7 weeks post  
233 disease onset; **Fig. 5b, c**). The data show that IgG levels decrease between 1<sup>st</sup> to 2<sup>nd</sup> study  
234 visit (Geo. Mean S/C0=4.6 vs. Geo. Mean S/C0=3.7) followed by a relatively constant IgG  
235 levels for 10 months after infection (Geo. Mean S/C0=3.0) (**Fig. 5b, Supplementary Table**  
236 **1**). While the detection of S1-reactivity stays equal at first and second visit (86%), the fraction  
237 of individuals that are reactive for S1-reactive antibodies decays to 79% (7% drop from visit  
238 1) at the third visit and to 73% (13% drop from visit 1) at visit 4 (9-10 months post disease  
239 onset).

240 NAb activity was longitudinally monitored for 342 individuals from visit 1 (median 6.4 weeks  
241 post infection) to visit 2 (median 17.3 weeks post infection) (**Fig. 5d-g**). Regression modeling  
242 showed that serum NAb titers had a short half-life of 6.7 weeks compared to a much longer  
243 30.8-week half-life for IgG NAb titers (**Fig. 5d, e**). Out of 342 individuals, 87.1% had serum  
244 NAb activity at visit 1 whereas only 70.5% had NAb activity remaining at visit 2 (**Fig. 5f**). The  
245 overall fraction of IgG neutralizers changed from 82% to 75% between visit 1 and 2. The  
246 most dramatic drop from Geo Mean IC<sub>50</sub> of 16.23  $\mu\text{g/ml}$  to 45.54  $\mu\text{g/ml}$  was detected in elite  
247 neutralizers, 88% of whom lost their 'elite' status. 23.9% of average/low neutralizers at visit 1  
248 became negative at visit 2 (**Fig. 5g**). Approximately 11% of individuals did not develop any  
249 NABs and remained serum and IgG-negative at both visits. Overall, only 2.4% of the cohort

250 lost detectable antibody responses against SARS-CoV-2 between 1.5 and 4.5 months post  
251 infection (**Extended data figure 7a-e**).

252 In summary, these results show that in most individuals anti-spike IgG antibody levels are  
253 maintained for 10 months with a half-life estimate of 8.7 months. Moreover, even though  
254 there is a rapid decline in serum NAb activity, IgG NAb function remains relatively constant  
255 with an estimated half-life of 7.7 months. We conclude that although there is a decay of  
256 antibody titers in serum, the humoral IgG response persists for as long as 10 months after  
257 SARS-CoV-2 infection.

258

## 259 **Discussion**

260 In order to end the COVID-19 pandemic, widespread SARS-CoV-2 protective immunity will  
261 be required. Antibodies are critical for effective clearance of pathogens and for prevention of  
262 viral infections<sup>41</sup>. In this study, we examined the neutralizing antibody response in 963  
263 individuals who had recently recovered from SARS-CoV-2 infection. The cohort consists  
264 primarily (91.69%) of patients with mild COVID-19 therefore representing the predominant  
265 clinical course of this disease<sup>6</sup>. Since higher disease severity was shown to correlate with  
266 higher antibody responses<sup>14,42</sup>, cohorts mainly composed of hospitalized individuals have  
267 limited applicability on the majority of COVID-19 cases<sup>20,35,43,44</sup>. Moreover, to our knowledge  
268 this is the most comprehensive study (n=963), in which neutralizing antibody activity has  
269 been reported to date with the next largest study having analyzed 4-5 fold less individuals at  
270 a single time point<sup>45</sup>.

271 Upon recovery from COVID-19, we detected the development of a broad spectrum of IgG  
272 neutralizing activity ranging from no neutralization (threshold  $IC_{50} < 750 \mu\text{g/ml}$ , 21%) to low  
273 ( $IC_{50} = 50\text{-}750 \mu\text{g/ml}$ , 10%), average ( $IC_{50} = 100\text{-}500 \mu\text{g/ml}$ , 44.8%), high ( $IC_{50} = 20\text{-}100$   
274  $\mu\text{g/ml}$ , 20.9%), and elite SARS-CoV-2 neutralization ( $IC_{50} < 20 \mu\text{g/ml}$ , 3.3%). 94.4% of  
275 individuals were found to possess S- or N-reactive antibodies or neutralizing activity at serum

276 or IgG level. Thus, while most individuals develop a detectable antibody response upon  
277 natural infection, the extent of SARS-CoV-2 neutralizing activity is highly variable with the  
278 fraction of non-responders being highest for asymptomatic individuals (23%).

279 The broad spectrum of neutralizing activity developed in COVID-19 recovered individuals  
280 may impact the level of protective immunity. For instance, asymptomatic infection is  
281 estimated to account for up to 40% of all infections<sup>46</sup>. In these individuals and in other  
282 patients with weak antibody responses, lower IgG titers may contribute to a higher  
283 susceptibility to re-infection. Recently, mutated virus strains were reported<sup>47,48</sup>, some of  
284 which possess mutations causing partial resistance to convalescent plasma<sup>48</sup> or SARS-CoV-  
285 2 monoclonal antibodies<sup>49</sup>. A weak antibody response may help propagate escape variants  
286 and may therefore complicate effective measures to combat the COVID-19 pandemic.

287 To guide vaccine strategies based on population demographics, it is critical to understand  
288 which clinical features affect the development of antibody responses. NAb response  
289 presented here is comparable to recent spike-based mRNA vaccine studies in age group 18-  
290 55, where geometric mean neutralizing titers were in the range of 100-300 ID<sub>50</sub> (depending  
291 on dose) 1.5 months post vaccination<sup>17,50</sup> versus 111.3 ID<sub>50</sub> in this study. Recent studies  
292 have reported that age, gender and disease severity<sup>14,36,44</sup> can impact SARS-CoV-2 NAb  
293 titers<sup>14,36,42,43,45</sup>. However, a comprehensive analysis on a large representative cohort was  
294 missing. Using multivariate statistical analysis on the antibody measurements and clinical  
295 data, we found that higher anti-spike antibody levels, older age, symptomatic infection and a  
296 severe course of COVID-19 were highly predictive of NAb titers. Notably, based on previous  
297 vaccine studies<sup>51</sup>, it was frequently speculated that older individuals might generate a less  
298 efficient immune responses to SARS-CoV-2 infection or vaccination. However, based on our  
299 data, the >60 age group had the highest level of neutralizing IgG antibodies (mean IC<sub>50</sub> =  
300 84.8 µg/ml, mean ID<sub>50</sub> serum titer = 276.6).

301 In some individuals we detected very high levels of SARS-CoV-2 neutralizing activity (IC<sub>50</sub> <  
302 20 µg/ml, ID<sub>50</sub> serum titer > 2,500) ranking them as 'elite neutralizers'. While cross-reactivity

303 against SARS-CoV-1 and other Beta-CoVs has been shown for some SARS-CoV-2  
304 recovered individuals<sup>52-54</sup>, we revealed that all elite neutralizers have cross-reactive IgG  
305 NAbS against SARS-CoV-1. Moreover, IgG from elite neutralizers could efficiently block  
306 infection of 6 SARS-CoV-2 strains. Two of them (BavP1 and DRC94) contain the D614G  
307 mutation in the S protein<sup>55</sup> associated with higher infectivity<sup>56</sup>. Given the eminent risk of novel  
308 emerging CoVs and monoclonal antibody-resistant SARS-CoV-2 variants, developing  
309 antibodies with broader neutralization breadth would be critical. Further evaluation of the  
310 antibody response in such elite neutralizers at the single B cell level will be required to  
311 understand the details of such potent NAb responses and can yield the identification of new  
312 highly potent cross-reactive monoclonal antibodies.

313 Effective neutralization and clearance of pathogens is mainly mediated by IgG antibodies,  
314 which are typically formed within 1-3 weeks post infection and often provide long-term  
315 immunity that can last decades<sup>57</sup>. Protective immunity to seasonal coronaviruses like NL63,  
316 229E, OC43 and HKU1 is known to be short lived and re-infection is common<sup>58</sup>. In addition,  
317 the antibody response to SARS-CoV-1 and Middle East Respiratory Syndrome (MERS)-CoV  
318 was shown to wane over time<sup>59</sup>. Upon SARS-CoV-1 infection, serum IgG and NAbS were  
319 shown to decline 3 years after infection<sup>60</sup>. This suggests that immunity to CoVs is rather short  
320 lived compared to some other viruses such as measles virus, for which life-long antibody  
321 immunity is observed<sup>57</sup>. In our study we not only measured serum neutralization, but also  
322 quantified SARS-CoV-2 IgG neutralizing activity. While serum neutralization waned quickly  
323 (half-life of 1.5 months), levels of purified IgG rather persisted with a longer half-life of 7.7  
324 months. The sharp drop in serum neutralization could be a consequence of a decline in anti-  
325 spike IgA and IgM titers<sup>34</sup>, which along with IgG, cumulatively contribute to serum NAb  
326 activity<sup>61</sup>. Finally, SARS-CoV-2 spike-based mRNA vaccines<sup>17</sup> were shown to induce NAb  
327 titers in different age groups for a time span up to 4.25 months<sup>18</sup>. In this study, we found that  
328 although SARS-CoV-2-reactive IgG levels decline by 17% within the first 4 months after  
329 infection, anti-spike IgG can be persistently detected in the majority of COVID-19 cases for  
330 up to 10 months post infection.

331 In summary, the data presented in this study provides new insight into the features that  
332 shape the SARS-CoV-2 NAb response in COVID-19 recovered individuals. Longitudinal  
333 mapping of antibody responses reveals a relatively long-lived IgG antibody response lasting  
334 up to 10 months. Since many SARS-CoV-2 vaccines are spike protein-based<sup>62</sup>, studying  
335 antibody dynamics informs us on longevity of natural immunity as well as may help to inform  
336 on vaccination strategies and outcomes in the population.

337

## 338 **Methods**

### 339 **Enrollment of participants and study design**

340 Blood samples were collected from donors who gave their written consent under the  
341 protocols 20-1187 and 16-054, approved by the Institutional Review Board (IRB) of the  
342 University Hospital Cologne. All samples were handled according to the safety guidelines of  
343 the University Hospital Cologne. Individuals that met the inclusion criteria of i.)  $\geq 18$  years old  
344 and ii.) history of SARS-CoV-2 positive polymerase chain reaction (PCR) from  
345 nasopharyngeal swab or collected sputum, and/or iii.) an onset of COVID-19 specific  
346 symptoms longer than 3 weeks ago, were enrolled in this study. Demographical data,  
347 COVID-19-related pre-existing conditions, and information on the clinical course were  
348 collected at study visit 1. Blood samples were collected starting from study visit 1, for up to 4  
349 follow up visits between the 6<sup>th</sup> of April and 17<sup>th</sup> of December 2020.

### 350 **Processing of serum, plasma and whole blood samples**

351 Blood samples were collected in Heparin syringes or EDTA monovette tubes (Becton  
352 Dickinson) and fractionated into plasma and peripheral blood mononuclear cell (PBMC) by  
353 density gradient centrifugation using Histopaque-1077 (Sigma). Plasma aliquots were stored  
354 at  $-80^{\circ}\text{C}$  till use. Serum was collected from Serum-gel tubes (Sarstedt) by centrifugation and  
355 stored at  $-80^{\circ}\text{C}$  till use.

### 356 **Isolation of IgGs from serum and plasma samples**

357 For the isolation of total IgG, 0.5-1 mL plasma or serum was heat inactivated at 56°C for 45  
358 minutes and incubated overnight with Protein G Sepharose 4 Fast Flow beads (GE  
359 Healthcare) at 4°C. Next day, beads were washed on chromatography columns (BioRad)  
360 and Protein G bound IgG was eluted using 0.1M Glycine pH=3 and instantly buffered in 1M  
361 Tris pH=8. Buffer exchange to PBS (Gibco) was performed using 30 kDa Amicon Ultra-15  
362 columns (Millipore) and the purified IgG was stored at 4°C.

### 363 **Cloning of SARS-CoV-2 spike variants**

364 The codon optimized SARS-CoV-2 Wu01 spike (EPI\_ISL\_40671) was cloned into  
365 pCDNA<sup>TM</sup>3.1/V5-HisTOPO vector (Invitrogen). SARS-2-S global strains (BavP1  
366 EPI\_ISL\_406862; ARA36 EPI\_ISL\_418432; DRC94 EPI\_ISL\_417947; CA5  
367 EPI\_ISL\_408010; NRW8 EPI\_ISL\_414508) were generated by introducing the  
368 corresponding amino acid mutations (**Extended Data Fig. 5**) using the Q5® Site-Directed  
369 Mutagenesis Kit (NEB) and per manufacturer's protocol.

### 370 **Production of SARS-CoV pseudovirus particles**

371 Pseudovirus particles were generated by co-transfection of individual plasmids encoding  
372 HIV-1 Tat, HIV-1 Gag/Pol, HIV-1 Rev, luciferase followed by an IRES and ZsGreen, and the  
373 SARS-CoV-2 spike protein as previously described<sup>63</sup>. In brief, HEK 293T cells were  
374 transfected with the pseudovirus encoding plasmids using FuGENE 6 Transfection Reagent  
375 (Promega). The virus culture supernatant was harvested at 48h and 72h post transfection  
376 and stored at -80°C until use. Each virus batch was titrated by infecting 293T-ACE2 and after  
377 a 48-hour incubation period at 37°C and 5% CO<sub>2</sub>, luciferase activity was determined after  
378 addition of luciferin/lysis buffer (10 mM MgCl<sub>2</sub>, 0.3 mM ATP, 0.5 mM Coenzyme A, 17 mM  
379 IGEPAL (all Sigma-Aldrich), and 1 mM D-Luciferin (GoldBio) in Tris-HCL) using a microplate  
380 reader (Berthold). An RLU of approximately 1000-fold in infected cells versus non-infected  
381 cells was used for neutralization assays.



## 382 **Pseudovirus assay to determine IgG/plasma/serum SARS-CoV-2 neutralizing activity**

383 For testing SARS-CoV-2 neutralizing activity of IgG or serum/plasma samples, serial  
384 dilutions of IgG or serum/plasma (heat inactivated at 56°C for 45 min) were co-incubated with  
385 pseudovirus supernatants for 1 h at 37°C prior to addition of 293T cells engineered to  
386 express ACE2<sup>63</sup>. Following a 48-hour incubation at 37°C and 5% CO<sub>2</sub>, luciferase activity was  
387 determined using the reagents described above. After subtracting background relative  
388 luminescence units (RLUs) of non-infected cells, 50% inhibitory concentrations (IC<sub>50</sub>s) were  
389 determined as the IgG concentrations resulting in a 50% RLU reduction compared to  
390 untreated virus control wells. 50% Inhibitory dose (ID<sub>50</sub>) was determined as the serum  
391 dilution resulting in a 50% reduction in RLU compared to the untreated virus control wells.  
392 Each IgG and serum sample were measured in two independent experiments on different  
393 days and the average IC<sub>50</sub> or ID<sub>50</sub> values have been reported. For each run, a SARS-CoV-2  
394 neutralizing monoclonal antibody was used as control to ensure consistent reproducibility in  
395 experiments carried out on different days. Assay specificity calculated using pre-COVID-19  
396 samples was found to be 100%. IC<sub>50</sub> and ID<sub>50</sub> values were calculated in GraphPad Prism 7.0  
397 by plotting a dose response curve.

## 398 **SARS-CoV-2 live virus isolation from nasopharyngeal swabs**

399 For outgrowth cultures of authentic SARS-CoV-2 from nasopharyngeal swabs, 1x10<sup>6</sup> VeroE6  
400 cells were seeded onto a T25 flask (Sarstedt) on the previous day DMEM (Gibco) containing  
401 10% FBS, 1% PS, 1mM L-Glutamine and 1mM Sodium pyruvate. 0.2 mL swab in VNT  
402 medium was diluted with 0.8 mL DMEM (Gibco) containing 2% FBS, 1% PS, 1mM L-  
403 Glutamine and 1mM Sodium pyruvate. The swab dilution was added to VeroE6 cells and left  
404 for 1 hour at 37°C, 5%CO<sub>2</sub> after which an additional 3 mL medium was added. The cultures  
405 were examined for the next days for CPE and samples were sent for viral load analysis to  
406 track growth of virus by E-gene qPCR. Cell culture supernatant was harvested from positive  
407 cultures and stored at -150°C until use. Virus was titrated by adding serial dilutions of virus  
408 supernatant (8 replicates) on VeroE6 cells in DMEM (Gibco) containing 2% FBS, 1% PS,



409 1mM L-Glutamine and 1mM Sodium pyruvate. After 4 days of incubation at 37°C, 5% CO<sub>2</sub>,  
410 the presence or absence of cytopathic effects (CPE) was noted in using a brightfield  
411 microscope. TCID<sub>50</sub> was calculated using the Spearman and Kaerber algorithm<sup>64,65</sup>.

#### 412 **SARS-CoV-2 live virus neutralization assay**

413 Live SARS-CoV-2 (termed CoV2-P3) was grown out from a swab from Cologne using  
414 VeroE6 cells as described above and then expanded in culture by superinfection of VeroE6  
415 from the initial outgrowth culture. Whole genome sequencing of the isolated virus was done  
416 isolating viral RNA using the QIAamp MinElute Virus Spine kit (Qiagen) and performing  
417 Illumina sequencing. The virus spike amino acid sequence (**Extended Data Fig. 5**) is similar  
418 to the Wu01 spike (EPI\_ISL\_40671) with the exception that it contains the D641G mutation.  
419 For the neutralization assay, dilutions of IgG were co-incubated with the virus (1000-2000  
420 TCID<sub>50</sub>) for 1 h at 37°C prior to addition of VeroE6 cells in DMEM (Gibco) containing 2%  
421 FBS, 1% PS, 1mM L-Glutamine and 1mM Sodium pyruvate. After 4 days of incubation at  
422 37°C, 5% CO<sub>2</sub>, neutralization was analyzed by observing cytopathic effects (CPE) using a  
423 brightfield microscope and the highest dilution well with no CPE was noted to be the IC<sub>100</sub> for  
424 the antibody. Assay specificity calculated using pre-COVID-19 samples was found to be  
425 100%. All samples were measured in two independent experiments on separate days and  
426 the average IC<sub>100</sub> from all measurements has been reported.

#### 427 **Detection of anti-SARS-CoV-2 spike IgG and IgA by ELISA**

428 For assessing IgA and IgG antibody titers, the Euroimmun anti-SARS-CoV-2 ELISA using  
429 the S1 domain of the spike protein as antigen was used (Euroimmun Diagnostik, Lübeck,  
430 Germany). Serum or plasma samples were tested on the automated system Euroimmun  
431 Analyzer I according to manufacturer's recommendations. Signal-to-cut-off (S/CO) ratio was  
432 calculated as extinction value of patient sample/extinction value of calibrator. IgA and IgG  
433 S/CO values were interpreted as positive S/CO ≥1.1, equivocal S/CO ≥0.8 - <1.1, and  
434 negative S/CO <0.8. Additional commercial kits used for antibody measurements were also  
435 used as per manufacturer's recommendations; Anti-S1/S2 IgG was measured using

436 DiaSorin's LIAISON® SARS-CoV-2 ELISA kit with the following cut-off values: negative  
437 <12.0 AU/ml, equivocal  $\geq 12.0$ - < 15.0 AU/ml and positive  $\geq 15.0$  AU/ml. Anti-N Pan-IgG were  
438 measured using Roche's Elecsys®-Assay with cut-off values: non-reactive < 1,0 COI and  
439 reactive  $\geq 1,0$  COI. Anti-N IgG were measured with Abbott's Alinity i system with cut-off  
440 values: positive S/CO  $\geq 1.4$  and negative S/CO <1.4. Assay specificities calculated using pre-  
441 COVID-19 samples: Euroimmun IgG 100%; Euroimmun IgA 96%; Roche 98%; Diasorin  
442 98%; Abbott 98%.

#### 443 **Measurement of SARS-CoV-2 RNA levels from nasopharyngeal swabs**

444 Cycle threshold values for quantifying viral load in naso/oro-pharyngeal swabs was done by  
445 qPCR using LightMix® SarbecoV E-gene<sup>66</sup> plus EAV control (TIB Molbiol, Berlin, Germany)  
446 in combination with the N-gene (inhouse primer sets in multiplex PCR) on LightCycler® 480  
447 (Roche Diagnostics).

#### 448 **Statistical modeling**

449 To select features that are predictive for the  $\log_{10}$  response in a multivariate analysis (Fig.  
450 3b), forward stepwise regression was applied, using the p-value from a likelihood ratio test (R  
451 function `lmtest::lrtest`) as selection criterion in each step. The final multiple linear regression  
452 model (Fig. 3c) includes only features that show a significant model improvement  
453 ( $\alpha=0.05$ ) in the feature selection phase. To study the interplay of the different features  
454 regarding their relationship with the response (Fig. 3d), a Bayesian network was learned by  
455 maximizing the BIC score for hybrid networks via hill-climbing (R function `bnlearn::hc`)<sup>67</sup>. To  
456 enforce it to be a sink in the network, all outgoing edges from the response variable were  
457 blacklisted prior to learning. For the longitudinal analyses (Fig. 5e-h), linear mixed effect  
458 models (R-function `nlme:lme`) were applied to all data points from both visits, where each  
459 patient has its own intercept. Since a binary transformation of the response was used, half-  
460 life estimates were computed as negative inverse of the common slope regression  
461 coefficient. Prediction intervals were computed using R-function `ggeffects::ggpredict`<sup>68</sup>.

462 **Figure legends**

463 **Figure 1: SARS-CoV-2 recovered cohort and study design**

464 **a**, Illustration depicting study timeline and number of individuals analyzed at each study visit.  
465 Graph represents sample collection time for participants in weeks since disease onset  
466 (symptom onset date or positive PCR date). **b**, age distribution of the cohort **c**, gender  
467 distribution, presence of pre-conditions and disease severity.

468

469 **Figure 2: Neutralizing antibody response after recovery from SARS-CoV-2 infection**

470 **a**, pie chart illustrating fraction of serum neutralizers against Wu01 pseudovirus at study visit  
471 1. Violin plot depicts serum ID<sub>50</sub> values for the neutralizers ( $n=793$ ), categorized based on  
472 serum ID<sub>50</sub> titers. Dotted line represents the LOD (10-fold dilution) of the assay. **b**, pie chart  
473 depicting the fraction of IgG neutralization against Wu01 pseudovirus at study visit 1. Violin  
474 plot depicts IgG IC<sub>50</sub> values for the neutralizers ( $n=760$ ), categorized based on IgG IC<sub>50</sub>.  
475 Dotted line represents the LOD (750  $\mu\text{g/ml}$ ) of the assay. **c**, pie chart comparing fraction of  
476 samples with neutralization at serum and/or IgG level. Spearman correlation plot between  
477 serum ID<sub>50</sub> and IgG IC<sub>50</sub> values at study visit 1. **d**, violin plot of Euroimmun ELISA signal over  
478 cut-off (S/CO) ratios for anti-spike IgG. Dotted line represents LOD (S/CO=1.1) of the assay.  
479 **e**, pie charts illustrating fraction of anti-spike IgG reactive individuals in the Euroimmun  
480 ELISA. **f**, spearman correlation between Euroimmun IgG S/CO and IgG IC<sub>50</sub> at study visit 1.  
481 **g**, plot depicting binding against spike, Nucleocapsid (N) and neutralizing response against  
482 authentic virus (AV) and Wu01 pseudovirus (PSV) of the IgG negative fraction ( $n=166$ ) with  
483 each row representing 1 individual. **h**, pie charts showing total fraction of individuals with  
484 binding or neutralizing activity in the IgG-fraction from **g**. **i**, pie chart representing total  
485 combined binding and NAb response in the cohort ( $n=963$ ) and bar graph of the Ab-negative  
486 individuals based on disease severity. LOD, limit of detection

487

488 **Figure 3: Correlates of neutralizing activity against SARS-CoV-2**

489 **a**, violin plots depicting IgG neutralization IC<sub>50</sub> values at study visit 1 against Wu01  
490 pseudovirus, subdivided based on age, disease severity, gender and pre-conditions. Dotted  
491 line represents the limit of detection (750 µg/ml) of the assay. Statistical analysis was  
492 performed Kruskal-Wallis and Mann-Whitney tests. **b**, multiple linear regression model for  
493 predicting IgG IC<sub>50</sub> using the features: Euroimmun S/CO, gender, age, disease severity, pre-  
494 conditions, weeks since infection and the 9 reported symptoms. Plot below depicts model  
495 coefficients to study the goodness of fit of the final IC<sub>50</sub> prediction model. **c**, Bayesian  
496 network of the features predicting IgG IC<sub>50</sub> are plotted using the bnlearn R package. The  
497 graph connects the features which are predictive of each other with IgG IC<sub>50</sub> as sink.

498

499 **Figure 4: Cross-neutralization by SARS-CoV-2 elite neutralizers**

500 **a**, heat maps visualizing the neutralizing activity of 15 individuals from each neutralization  
501 category: Elite-, High-, Average-, Low-, and Non-neutralizers (total n=75) against SARS-  
502 CoV-2-S pseudovirus, SARS-CoV-2 authentic virus and SARS-CoV (SARS-1) pseudovirus.  
503 **b**, Spearman correlation of IgG IC<sub>50</sub> against SARS-2-S and SARS-1-S pseudovirus. **c**, details on the  
504 source and type of spike mutations in 6 global strains of SARS-CoV-2 generated and used in  
505 this study. **d**, heat map visualizing the IC<sub>50</sub> values of 15 Elite-neutralizers against the 6  
506 SARS-CoV-2 global spike variants from **c**.

507

508 **Figure 5: Longitudinal maintenance of anti-SARS-CoV-2 IgG antibody titers**

509 **a**, IgG ELISA ratios (n=1,669) plotted against weeks since infection for half-life estimate of  
510 anti-spike IgG levels using a linear mixed-effects model. **b**, longitudinal mapping of IgG levels  
511 in 131 individuals from visit 1-4. Dot plots illustrate antibody titer against the weeks since  
512 infection to study visit 1 (red) and study visit 2 (blue). Geometric mean change shown in

513 black. Dotted lines represent limit of detection (S/CO=1.1 for IgG ELISA). **c**, pie charts  
514 illustrate the change in the fraction of IgG ELISA positive (Pos), Negative (Neg) and  
515 Equivocal (Equi) samples (n=131) between the study visits. **d**, serum ID<sub>50</sub> values against  
516 Wu01 pseudovirus (n=1,017) and **e**, IgG IC<sub>50</sub> values against Wu01 pseudovirus (n=996)  
517 plotted against weeks since infection for half-life estimate of the antibody levels using a linear  
518 mixed effects model. Longitudinal mapping of serum neutralization (**f**) and IgG neutralization  
519 (**g**) in 342 individuals at study visit 1 and 2. Serum and IgG non-neutralizers were assigned  
520 values of ID<sub>50</sub>=5 and IC<sub>50</sub>=900 for plotting. Dotted lines represent limit of detection (ID<sub>50</sub> of 10  
521 and IC<sub>50</sub> of 750 µg/ml for serum and IgG neutralization assays). Pie charts illustrate the  
522 change in the fraction of serum neutralizers (**f**) and IgG neutralizers (**g**) in the samples  
523 (n=342) between the study visits.

524

#### 525 **Extended Data Figure 1: Samples used for analysis of SARS-CoV-2 antibody response**

526 **a**, Illustration depicting processing of blood samples and IgG purification from plasma or  
527 serum samples. **b**, Plot analyzing the efficiency of IgG purification from plasma or serum as  
528 compared to clinical reference range. Statistical testing performed with Kruskal-Wallis test.  
529 Validation of the pseudovirus neutralization test against SARS-2-S Wu01 pseudovirus using  
530 Pre-COVID-19 plasma (**c**) and IgG (**d**) samples with a neutralizing monoclonal antibody as  
531 positive control<sup>28</sup>.

532

#### 533 **Extended Data Figure 2: Correlation between neutralization and serology results**

534 **a**, violin plot of Euroimmun ELISA signal over cut-off (S/CO) ratios for anti-spike IgA. Dotted  
535 line represents the limit of detection (S/CO=1.1) of the assay. **b**, Spearman correlation plot  
536 between Euroimmun IgA S/CO and serum ID<sub>50</sub> values at study visit 1. Euroimmun IgA S/CO  
537 and serum ID<sub>50</sub> values at study visit 1. Pie charts illustrating the fraction of serum neutralizers  
538 and non-neutralizers and their corresponding Euroimmun IgA ELISA result for comparison. **c**,

539 Spearman correlation plot of Euroimmun IgG S/CO ratios vs. IgA S/CO ratios at study visit 1.  
540 **d**, Spearman correlation plot between Euroimmun IgG S/CO and serum ID<sub>50</sub> values at study  
541 visit 1. Pie charts illustrating the fraction of serum neutralizers and non-neutralizers and their  
542 corresponding Euroimmun IgG ELISA result for comparison.

543

### 544 **Extended Data Figure 3: Correlates of anti-SARS-CoV-2 antibody titers**

545 **a**, violin plots depicting serum neutralization at study visit 1 against Wu01 pseudovirus,  
546 subdivided based on age, disease severity, gender and pre-conditions. Dotted line  
547 represents the limit of detection (1:10 dilution) of the assay. **b**, violin plots depicting  
548 Euroimmun IgG ELISA S/CO at study visit 1, subdivided based on age, disease severity,  
549 gender and pre-conditions. Dotted line represents the limit of detection (S/CO=1.1) of the  
550 assay. **c**, violin plots depicting Euroimmun IgA ELISA S/CO at study visit 1, subdivided based  
551 on age, disease severity, gender and pre-conditions. Dotted line represents the limit of  
552 detection (S/CO=1.1) of the assay. **a**, **b** and **c** Statistical analysis was performed using  
553 Kruskal-Wallis and Mann-Whitney tests.

554

### 555 **Extended Data Figure 4: Statistical predication of SARS-CoV-2 antibody responses**

556 **a**, multiple linear regression model and model coefficients for predicting serum neutralization  
557 using the features: Euroimmun S/CO, gender, age, disease severity, pre-conditions, weeks  
558 since infection and the 9 reported symptoms. **b**, Bayesian network of the features predicting  
559 serum ID<sub>50</sub> are plotted using the bnlearn R package. The graph connects the features which  
560 are predictive of each other with serum ID<sub>50</sub> as sink. **c** and **d**, Multiple linear regression  
561 model for predicting IgG and IgA ratios using the features: gender, age, disease severity,  
562 pre-conditions, weeks since infection and the 9 reported symptoms. Plots on the right depicts  
563 model coefficients to study the goodness of fit of the corresponding final models. Spearman

564 correlation plot for diagnostic naso-/oro-pharyngeal swab Ct values for E-gene (**e**) or N-gene  
565 (**f**) vs. IgG IC<sub>50</sub>, serum ID<sub>50</sub>, anti-spike IgG and anti-spike IgA values at study visit 1.

566

567 **Extended Data Figure 5: Neutralization of different strains by SARS-CoV-2 elite-**  
568 **neutralizers**

569 **a**, plots for the distribution of gender, age and time since infection for the 15 individuals  
570 selected randomly from the five IgG neutralization categories: elite-, high-, average-, low-,  
571 and non-neutralizers (n=75 total). Statistical testing performed with Kruskal-Wallis test using  
572 Dunn's multiple comparisons. **b**, Spearman correlation of IgG IC<sub>50</sub> against SARS-2-S  
573 pseudovirus and SARS-2 authentic virus. **c**, Relative infectivity of SARS-CoV-2 global strain  
574 pseudovirus in 293T-ACE2 cells. **d**, Sequence alignment of the spike amino acid sequence  
575 of the 6 global SARS-CoV-2 strains and SARS-1 used for pseudovirus neutralization assays  
576 in this study.

577

578 **Extended Data Figure 6: Antibody kinetics in the early phase of SARS-CoV-2 infection**

579 **a**, Pie charts indicating distribution of gender and disease severity in individuals who were  
580 longitudinally monitored starting from the early phase of infection. **b**, Plots depicting IgG and  
581 IgA ratios over time in individuals (n=107). Dotted line represents the limit of detection  
582 (S/CO=1.1) of the Euroimmun ELISA. Statistical analysis was performed using a second  
583 order polynomial quadratic equation ( $R^2=0.128$  for IgG and  $R^2=0.140$  for IgA) with 95%  
584 confidence interval shading (IgG in blue and IgA in red) of the best line. **c**, Individual plots  
585 depicting IgG (blue) and IgA (red) levels over time. Gender and disease severity are  
586 indicated within each plot. Dotted line represents the limit of detection (S/CO=1.1) of the  
587 Euroimmun ELISA.

588  
589

590 **Extended Data Figure 7: Changes in Ab response against SARS-CoV-2 over time**

591 **a**, plot depicting SARS-CoV-2 S1 binding and Wu01 pseudovirus neutralization of 339  
592 individuals at visit 1 and visit 2 with each row representing 1 individual. Bar graphs showing  
593 change in fraction of individuals negative for anti-spike Abs (**b**), anti-spike NAbs (**c**) or any Ab  
594 response (**d**). **e**, pie chart evaluating the total presence if Ab response between visit 1 and 2  
595 for all individuals.

596

597 **Data availability statement**

598 All data including virus spike sequences are available in the manuscript main figures or  
599 supplementary material.

600

601 **Acknowledgements**

602 We are extremely grateful to all study participants who took part in this study; members of  
603 the Klein lab for helpful discussions; Reinhild Brinker, Marie Wunsch and Maike Wirtz for  
604 technical support; Daniela Weiland and Nadine Henn for project and laboratory management  
605 support; Stefan Poehlmann and Markus Hoffmann for sharing the Wuhan SARS-2-S spike  
606 construct; Jesse Bloom and Kate Crawford for sharing 293T-ACE2 cells and lentiviral  
607 constructs for production of SARS-CoV pseudovirus particles; Jason McLellan and  
608 Nianshuang Wang for sharing the SARS-1-S spike construct; Stephan Becker and Verena  
609 Kraehliv for sharing VeroE6 cells; Jeorg Timm, Andreas Walker and Max Damagnez for  
610 SARS-CoV-2 virus genome sequencing. This work was funded by grants to Florian Klein  
611 from the German Center for Infection Research (DZIF), the German Research Foundation  
612 (DFG) CRC1279 and CRC1310, European Research Council (ERC) ERC-stG639961 and  
613 COVIM: „NaFoUniMedCovid19“ (FKZ: 01KX2021).

614



## 615 Author contributions

616 F.Klein and K.V. conceptualized and designed the study; F.Klein, C.L., G.F. and N.P.  
617 provided supervision; K.V. and F.Klein wrote the first draft of the manuscript, all authors  
618 reviewed the manuscript draft and agree to the final version; M.A., P.S., L.G., F.D., V.C.,  
619 H.G., C.H., I.S., N.J., were involved in study participant interaction including obtaining  
620 informed consent, clinical data and sample collection and writing the study protocol. K.V. and  
621 F.Kleipass performed neutralization assays; V.C. and W.J. obtained ELISA data; F.Kleipass  
622 and K.V. performed IgG purification; K.V., V.C., F.K., F.D., P.S. analyzed data; K.V.  
623 performed final data analysis and R.E. performed statistical analysis; M.S., M.S.E., R.S. and  
624 P.M. processed blood samples; K.E., S.S. and E.H. were involved in data collection.

625

## 626 References

- 627 1 Zhu, N. *et al.* A Novel Coronavirus from Patients with Pneumonia in China, 2019. *N*  
628 *Engl J Med* **382**, 727-733, doi:10.1056/NEJMoa2001017 (2020).
- 629 2 Zhou, P. *et al.* A pneumonia outbreak associated with a new coronavirus of probable  
630 bat origin. *Nature* **579**, 270-273, doi:10.1038/s41586-020-2012-7 (2020).
- 631 3 Huang, C. *et al.* Clinical features of patients infected with 2019 novel coronavirus in  
632 Wuhan, China. *The Lancet* **395**, 497-506, doi:10.1016/s0140-6736(20)30183-5 (2020).
- 633 4 Mizrahi, B. *et al.* Longitudinal symptom dynamics of COVID-19 infection. *Nat*  
634 *Commun* **11**, 6208, doi:10.1038/s41467-020-20053-y (2020).
- 635 5 Rothe, C. *et al.* Transmission of 2019-nCoV Infection from an Asymptomatic Contact  
636 in Germany. *N Engl J Med* **382**, 970-971, doi:10.1056/NEJMc2001468 (2020).
- 637 6 Williamson, E. J. *et al.* Factors associated with COVID-19-related death using  
638 OpenSAFELY. *Nature* **584**, 430-436, doi:10.1038/s41586-020-2521-4 (2020).
- 639 7 Wolfel, R. *et al.* Virological assessment of hospitalized patients with COVID-2019.  
640 *Nature* **581**, 465-469, doi:10.1038/s41586-020-2196-x (2020).
- 641 8 He, X. *et al.* Temporal dynamics in viral shedding and transmissibility of COVID-19.  
642 *Nat Med* **26**, 672-675, doi:10.1038/s41591-020-0869-5 (2020).
- 643 9 Galvan-Tejada, C. E. *et al.* Persistence of COVID-19 Symptoms after Recovery in  
644 Mexican Population. *Int J Environ Res Public Health* **17**, doi:10.3390/ijerph17249367  
645 (2020).
- 646 10 Cirulli, E. T. *et al.* Long-term COVID-19 symptoms in a large unselected population.  
647 doi:10.1101/2020.10.07.20208702 (2020).
- 648 11 Huang. 6-month consequences of COVID-19 in patients discharged from hospital: a  
649 cohort study. *Lancet*, doi:[https://doi.org/10.1016/S0140-6736\(20\)32656-8](https://doi.org/10.1016/S0140-6736(20)32656-8) (2021).
- 650 12 Walls, A. C. *et al.* Structure, Function, and Antigenicity of the SARS-CoV-2 Spike  
651 Glycoprotein. *Cell* **181**, 281-292 e286, doi:10.1016/j.cell.2020.02.058 (2020).

- 652 13 Hoffmann, M. *et al.* SARS-CoV-2 Cell Entry Depends on ACE2 and TMPRSS2 and Is  
653 Blocked by a Clinically Proven Protease Inhibitor. *Cell*, doi:10.1016/j.cell.2020.02.052  
654 (2020).
- 655 14 Piccoli, L. *et al.* Mapping Neutralizing and Immunodominant Sites on the SARS-CoV-2  
656 Spike Receptor-Binding Domain by Structure-Guided High-Resolution Serology. *Cell*,  
657 doi:10.1016/j.cell.2020.09.037 (2020).
- 658 15 Rydzynski Moderbacher, C. *et al.* Antigen-Specific Adaptive Immunity to SARS-CoV-2  
659 in Acute COVID-19 and Associations with Age and Disease Severity. *Cell* **183**, 996-  
660 1012 e1019, doi:10.1016/j.cell.2020.09.038 (2020).
- 661 16 Ni, L. *et al.* Detection of SARS-CoV-2-Specific Humoral and Cellular Immunity in  
662 COVID-19 Convalescent Individuals. *Immunity* **52**, 971-977 e973,  
663 doi:10.1016/j.immuni.2020.04.023 (2020).
- 664 17 Sahin, U. *et al.* COVID-19 vaccine BNT162b1 elicits human antibody and TH1 T cell  
665 responses. *Nature* **586**, 594-599, doi:10.1038/s41586-020-2814-7 (2020).
- 666 18 Widge, A. T. *et al.* Durability of Responses after SARS-CoV-2 mRNA-1273 Vaccination.  
667 *N Engl J Med*, doi:10.1056/NEJMc2032195 (2020).
- 668 19 Long, Q. X. *et al.* Antibody responses to SARS-CoV-2 in patients with COVID-19. *Nat*  
669 *Med* **26**, 845-848, doi:10.1038/s41591-020-0897-1 (2020).
- 670 20 Seow, J. *et al.* Longitudinal observation and decline of neutralizing antibody  
671 responses in the three months following SARS-CoV-2 infection in humans. *Nat*  
672 *Microbiol* **5**, 1598-1607, doi:10.1038/s41564-020-00813-8 (2020).
- 673 21 Wajnberg, A. *et al.* Robust neutralizing antibodies to SARS-CoV-2 infection persist for  
674 months. *Science*, doi:10.1126/science.abd7728 (2020).
- 675 22 Zohar, T. & Alter, G. Dissecting antibody-mediated protection against SARS-CoV-2.  
676 *Nat Rev Immunol* **20**, 392-394, doi:10.1038/s41577-020-0359-5 (2020).
- 677 23 Dan, J. M. *et al.*, doi:10.1101/2020.11.15.383323 (2020).
- 678 24 Corti, D. & Lanzavecchia, A. Broadly neutralizing antiviral antibodies. *Annu Rev*  
679 *Immunol* **31**, 705-742, doi:10.1146/annurev-immunol-032712-095916 (2013).
- 680 25 Mercado, N. B. *et al.* Single-shot Ad26 vaccine protects against SARS-CoV-2 in rhesus  
681 macaques. *Nature* **586**, 583-588, doi:10.1038/s41586-020-2607-z (2020).
- 682 26 McMahan, K. *et al.* Correlates of protection against SARS-CoV-2 in rhesus macaques.  
683 *Nature*, doi:10.1038/s41586-020-03041-6 (2020).
- 684 27 Zost, S. J. *et al.* Rapid isolation and profiling of a diverse panel of human monoclonal  
685 antibodies targeting the SARS-CoV-2 spike protein. *Nat Med* **26**, 1422-1427,  
686 doi:10.1038/s41591-020-0998-x (2020).
- 687 28 Kreer, C. *et al.* Longitudinal Isolation of Potent Near-Germline SARS-CoV-2-  
688 Neutralizing Antibodies from COVID-19 Patients. *Cell* **182**, 843-854 e812,  
689 doi:10.1016/j.cell.2020.06.044 (2020).
- 690 29 Robbiani, D. F. *et al.* Convergent antibody responses to SARS-CoV-2 in convalescent  
691 individuals. *Nature* **584**, 437-442, doi:10.1038/s41586-020-2456-9 (2020).
- 692 30 Chen, P. *et al.* SARS-CoV-2 Neutralizing Antibody LY-CoV555 in Outpatients with  
693 Covid-19. *N Engl J Med*, doi:10.1056/NEJMoa2029849 (2020).
- 694 31 Weinreich, D. M. *et al.* REGN-COV2, a Neutralizing Antibody Cocktail, in Outpatients  
695 with Covid-19. *N Engl J Med*, doi:10.1056/NEJMoa2035002 (2020).
- 696 32 Ng, D. L. *et al.* SARS-CoV-2 seroprevalence and neutralizing activity in donor and  
697 patient blood. *Nat Commun* **11**, 4698, doi:10.1038/s41467-020-18468-8 (2020).
- 698 33 Wu, F. *et al.* Neutralizing antibody responses to SARS-CoV-2 in a COVID-19 recovered

- 699 2 patient cohort and their implications. *MedRxiv*, doi:10.1101/2020.03.30.20047365  
700 (2020).
- 701 34 Iyer, A. S. *et al.* Persistence and decay of human antibody responses to the receptor  
702 binding domain of SARS-CoV-2 spike protein in COVID-19 patients. *Sci Immunol* **5**,  
703 doi:10.1126/sciimmunol.abe0367 (2020).
- 704 35 Zeng, C. *et al.* Neutralizing antibody against SARS-CoV-2 spike in COVID-19 patients,  
705 health care workers, and convalescent plasma donors. *JCI Insight* **5**,  
706 doi:10.1172/jci.insight.143213 (2020).
- 707 36 Chen, X. *et al.* Disease severity dictates SARS-CoV-2-specific neutralizing antibody  
708 responses in COVID-19. *Signal Transduct Target Ther* **5**, 180, doi:10.1038/s41392-  
709 020-00301-9 (2020).
- 710 37 Lanzavecchia, A., Fruhwirth, A., Perez, L. & Corti, D. Antibody-guided vaccine design:  
711 identification of protective epitopes. *Curr Opin Immunol* **41**, 62-67,  
712 doi:10.1016/j.coi.2016.06.001 (2016).
- 713 38 Simek, M. D. *et al.* Human immunodeficiency virus type 1 elite neutralizers:  
714 individuals with broad and potent neutralizing activity identified by using a high-  
715 throughput neutralization assay together with an analytical selection algorithm. *J*  
716 *Viro* **83**, 7337-7348, doi:10.1128/JVI.00110-09 (2009).
- 717 39 Walker, L. M. & Burton, D. R. Passive immunotherapy of viral infections: 'super-  
718 antibodies' enter the fray. *Nat Rev Immunol* **18**, 297-308, doi:10.1038/nri.2017.148  
719 (2018).
- 720 40 Hadfield, J. *et al.* Nextstrain: real-time tracking of pathogen evolution. *Bioinformatics*  
721 **34**, 4121-4123, doi:10.1093/bioinformatics/bty407 (2018).
- 722 41 Murin, C. D., Wilson, I. A. & Ward, A. B. Antibody responses to viral infections: a  
723 structural perspective across three different enveloped viruses. *Nat Microbiol* **4**, 734-  
724 747, doi:10.1038/s41564-019-0392-y (2019).
- 725 42 Garcia-Beltran, W. F. *et al.* COVID-19 neutralizing antibodies predict disease severity  
726 and survival. *medRxiv*, doi:10.1101/2020.10.15.20213512 (2020).
- 727 43 Roltgen, K. *et al.* Defining the features and duration of antibody responses to SARS-  
728 CoV-2 infection associated with disease severity and outcome. *Sci Immunol* **5**,  
729 doi:10.1126/sciimmunol.abe0240 (2020).
- 730 44 Suthar, M. S. *et al.* Rapid Generation of Neutralizing Antibody Responses in COVID-19  
731 Patients. *Cell Rep Med* **1**, 100040, doi:10.1016/j.xcrm.2020.100040 (2020).
- 732 45 Luchsinger, L. L. *et al.* Serological Assays Estimate Highly Variable SARS-CoV-2  
733 Neutralizing Antibody Activity in Recovered COVID-19 Patients. *J Clin Microbiol* **58**,  
734 doi:10.1128/JCM.02005-20 (2020).
- 735 46 Oran, D. P. & Topol, E. J. Prevalence of Asymptomatic SARS-CoV-2 Infection : A  
736 Narrative Review. *Ann Intern Med* **173**, 362-367, doi:10.7326/M20-3012 (2020).
- 737 47 Andreano, E. *et al.* SARS-CoV-2 escape in vitro from a highly neutralizing COVID-19  
738 convalescent plasma. *bioRxiv*, doi:10.1101/2020.12.28.424451 (2020).
- 739 48 Tegally, H. *et al.* Emergence and rapid spread of a new severe acute respiratory  
740 syndrome-related coronavirus 2 (SARS-CoV-2) lineage with multiple spike mutations  
741 in South Africa. *MedRxiv*, doi:10.1101/2020.12.21.20248640 (2020).
- 742 49 Thomson, E. C. *et al.* The circulating SARS-CoV-2 spike variant N439K maintains  
743 fitness while evading antibody-mediated immunity. *BioRxiv*,  
744 doi:10.1101/2020.11.04.355842 (2020).
- 745 50 Jackson, L. A. *et al.* An mRNA Vaccine against SARS-CoV-2 - Preliminary Report. *N Engl*  
746 *J Med* **383**, 1920-1931, doi:10.1056/NEJMoa2022483 (2020).

- 747 51 Sasaki, S. *et al.* Limited efficacy of inactivated influenza vaccine in elderly individuals  
748 is associated with decreased production of vaccine-specific antibodies. *J Clin Invest*  
749 **121**, 3109-3119, doi:10.1172/JCI57834 (2011).
- 750 52 Rogers, T. F. *et al.* Isolation of potent SARS-CoV-2 neutralizing antibodies and  
751 protection from disease in a small animal model. *Science* **369**, 956-963,  
752 doi:10.1126/science.abc7520 (2020).
- 753 53 Lv, Z. *et al.* Structural basis for neutralization of SARS-CoV-2 and SARS-CoV by a  
754 potent therapeutic antibody. *Science* **369**, 1505-1509, doi:10.1126/science.abc5881  
755 (2020).
- 756 54 Prevost, J. *et al.* Cross-Sectional Evaluation of Humoral Responses against SARS-CoV-  
757 2 Spike. *Cell Rep Med* **1**, 100126, doi:10.1016/j.xcrm.2020.100126 (2020).
- 758 55 Korber, B. *et al.* Tracking Changes in SARS-CoV-2 Spike: Evidence that D614G  
759 Increases Infectivity of the COVID-19 Virus. *Cell* **182**, 812-827 e819,  
760 doi:10.1016/j.cell.2020.06.043 (2020).
- 761 56 Weissman, D. *et al.* D614G Spike Mutation Increases SARS CoV-2 Susceptibility to  
762 Neutralization. *Cell Host Microbe*, doi:10.1016/j.chom.2020.11.012 (2020).
- 763 57 Amanna, I. J., Carlson, N. E. & Slifka, M. K. Duration of humoral immunity to common  
764 viral and vaccine antigens. *N Engl J Med* **357**, 1903-1915,  
765 doi:10.1056/NEJMoa066092 (2007).
- 766 58 Edridge, A. W. D. *et al.* Seasonal coronavirus protective immunity is short-lasting. *Nat*  
767 *Med* **26**, 1691-1693, doi:10.1038/s41591-020-1083-1 (2020).
- 768 59 Huang, A. T. *et al.* A systematic review of antibody mediated immunity to  
769 coronaviruses: kinetics, correlates of protection, and association with severity. *Nat*  
770 *Commun* **11**, 4704, doi:10.1038/s41467-020-18450-4 (2020).
- 771 60 Cao, W. C., Liu, W., Zhang, P. H., Zhang, F. & Richardus, J. H. Disappearance of  
772 antibodies to SARS-associated coronavirus after recovery. *N Engl J Med* **357**, 1162-  
773 1163, doi:10.1056/NEJMc070348 (2007).
- 774 61 Klingler, J. *et al.* Role of IgM and IgA Antibodies in the Neutralization of SARS-CoV-2.  
775 *medRxiv*, doi:10.1101/2020.08.18.20177303 (2020).
- 776 62 Krammer, F. SARS-CoV-2 vaccines in development. *Nature* **586**, 516-527,  
777 doi:10.1038/s41586-020-2798-3 (2020).
- 778 63 Crawford, K. H. D. *et al.* Protocol and Reagents for Pseudotyping Lentiviral Particles  
779 with SARS-CoV-2 Spike Protein for Neutralization Assays. *Viruses* **12**,  
780 doi:10.3390/v12050513 (2020).
- 781 64 Kärber, G. Beitrag zur kollektiven Behandlung pharmakologischer Reihenversuche.  
782 *Naunyn-Schmiedebergs Archiv für Experimentelle Pathologie und Pharmakologie* **162**,  
783 480-483, doi:10.1007/bf01863914 (1931).
- 784 65 Spearman, C. The Method of 'Right and Wrong Cases' ('Constant Stimuli') without  
785 Gauss's Formulae. *British Journal of Psychology, 1904-1920* **2**, 227-242,  
786 doi:10.1111/j.2044-8295.1908.tb00176.x (1908).
- 787 66 Corman, V. M. *et al.* Detection of 2019 novel coronavirus (2019-nCoV) by real-time  
788 RT-PCR. *Euro Surveill* **25**, doi:10.2807/1560-7917.ES.2020.25.3.2000045 (2020).
- 789 67 Scutari, M. Learning Bayesian Networks with thebnlearnRPackage. *Journal of*  
790 *Statistical Software* **35**, doi:10.18637/jss.v035.i03 (2010).
- 791 68 Lüdtke, D. ggeffects: Tidy Data Frames of Marginal Effects from Regression Models.  
792 *Journal of Open Source Software* **3**, doi:10.21105/joss.00772 (2018).
- 793

## Figure 1

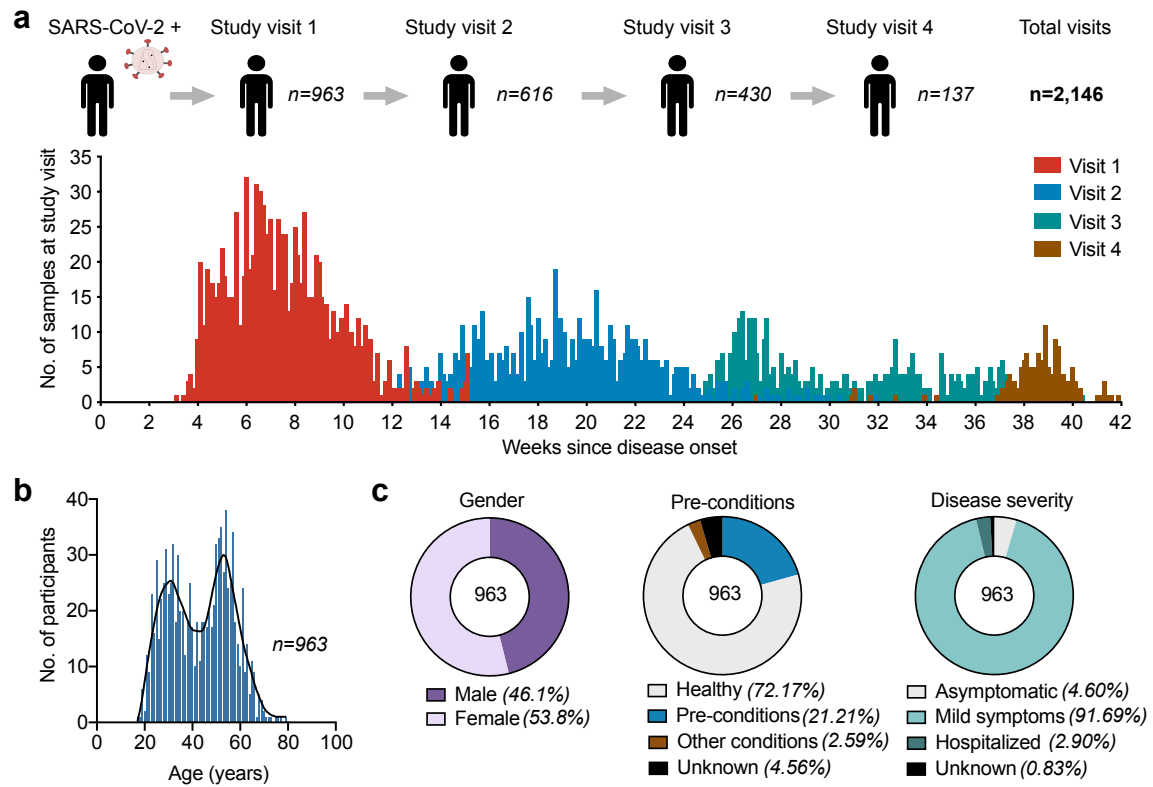

**Figure 1: SARS-CoV-2 recovered cohort and study design**

**a**, Illustration depicting study timeline and number of individuals analyzed at each study visit. Graph represents sample collection time for participants in weeks since disease onset (symptom onset date or positive PCR date). **b**, age distribution of the cohort **c**, gender distribution, presence of pre-conditions and disease severity.



## Figure 2

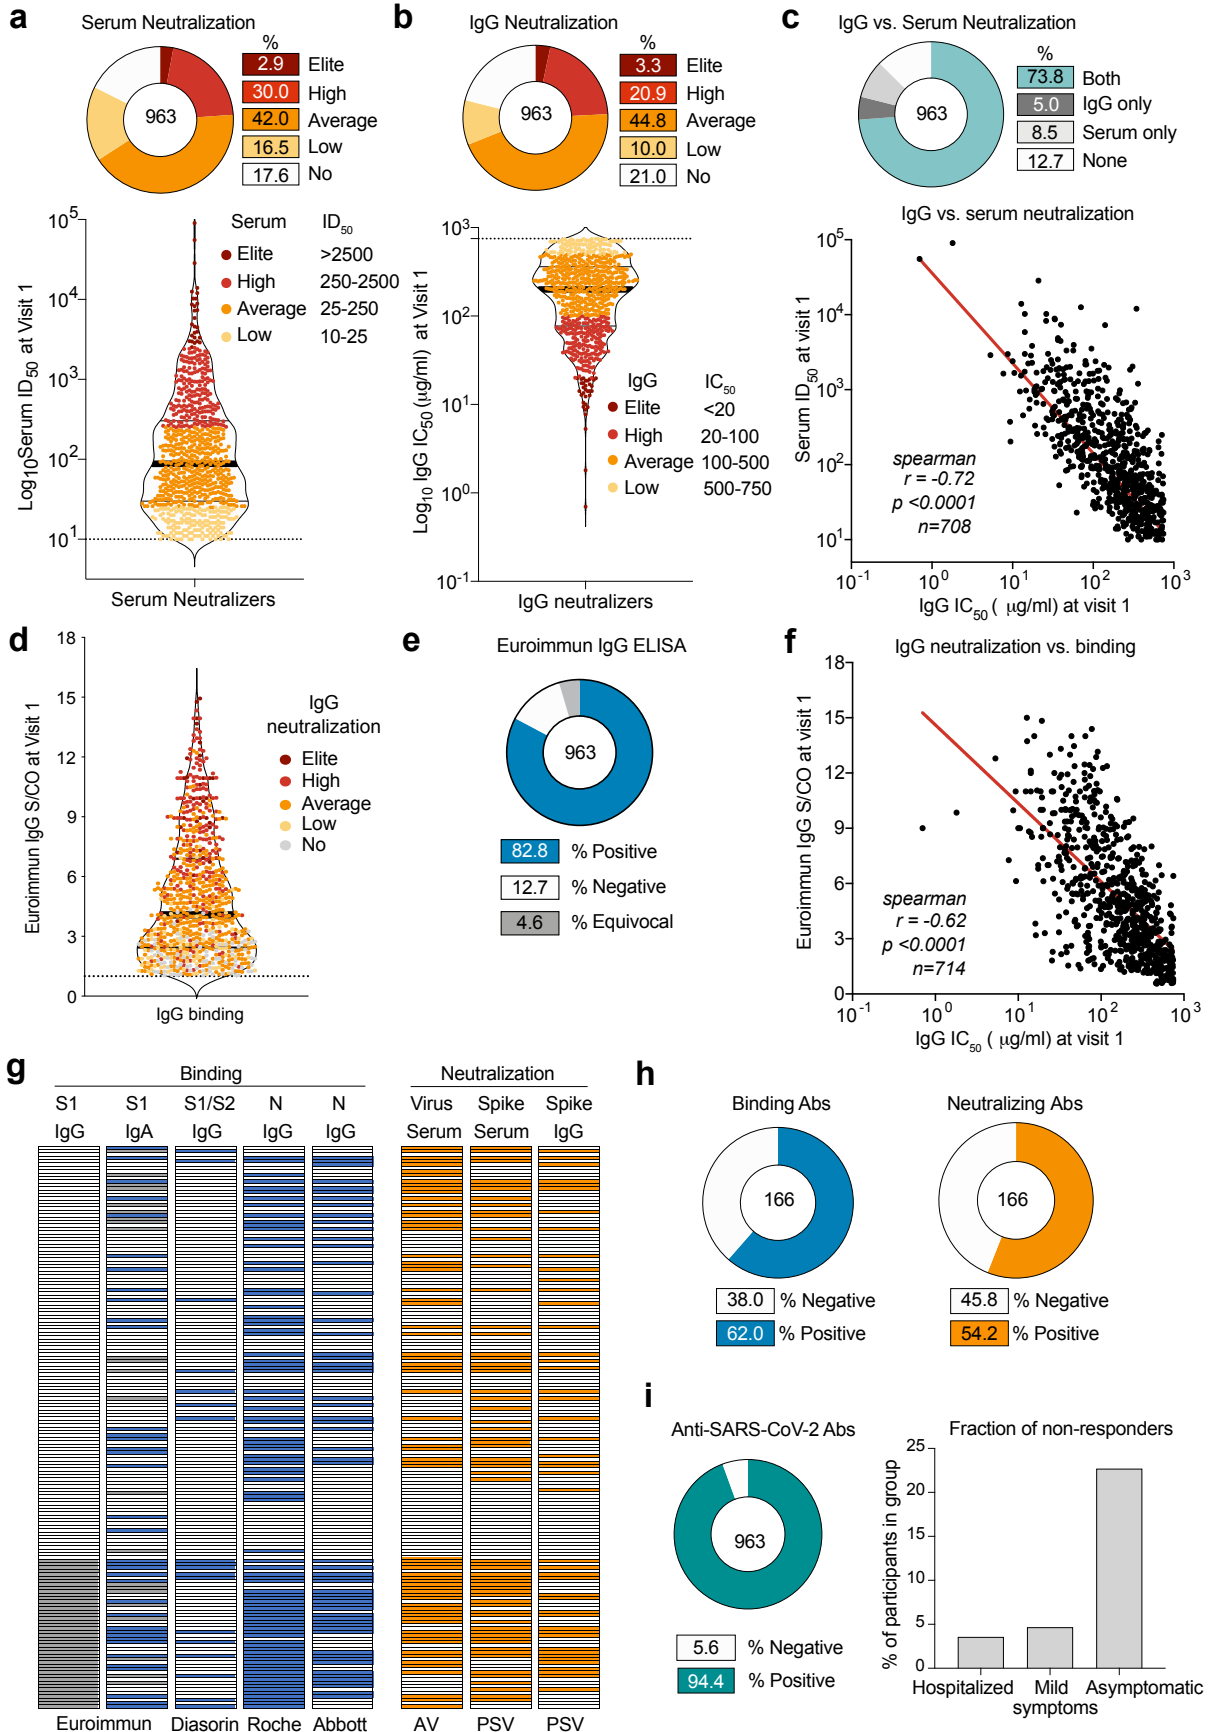

**Figure 2: Neutralizing antibody response after recovery from SARS-CoV-2 infection**

**a**, pie chart illustrating fraction of serum neutralizers against Wu01 pseudovirus at study visit 1. Violin plot depicts serum ID<sub>50</sub> values for the neutralizers ( $n=793$ ), categorized based on serum ID<sub>50</sub> titers. Dotted line represents the LOD (10-fold dilution) of the assay. **b**, pie chart depicting the fraction of IgG neutralization against Wu01 pseudovirus at study visit 1. Violin plot depicts IgG IC<sub>50</sub> values for the neutralizers ( $n=760$ ), categorized based on IgG IC<sub>50</sub>. Dotted line represents the LOD (750 μg/ml) of the assay. **c**, pie chart comparing fraction of samples with neutralization at serum and/or IgG level. Spearman correlation plot between serum ID<sub>50</sub> and IgG IC<sub>50</sub> values at study visit 1. **d**, violin plot of Euroimmun ELISA signal over cut-off (S/CO) ratios for anti-spike IgG. Dotted line represents LOD (S/CO=1.1) of the assay. **e**, pie charts illustrating fraction of anti-spike IgG reactive individuals in the Euroimmun ELISA. **f**, spearman correlation between Euroimmun IgG S/CO and Wu01 pseudovirus (PSV) of the IgG negative fraction ( $n=166$ ) with each row representing 1 individual. **g**, plot depicting binding against spike, Nucleocapsid (N) and neutralizing response against authentic virus (AV) and Wu01 pseudovirus (PSV) of the IgG negative fraction ( $n=166$ ) with each row representing 1 individual. **h**, pie charts showing total fraction of individuals with binding or neutralizing activity in the IgG-fraction from **g**. **i**, pie chart representing total combined binding and NAb response in the cohort ( $n=963$ ) and bar graph of the Ab-negative individuals based on disease severity. LOD, limit of detection

### Figure 3

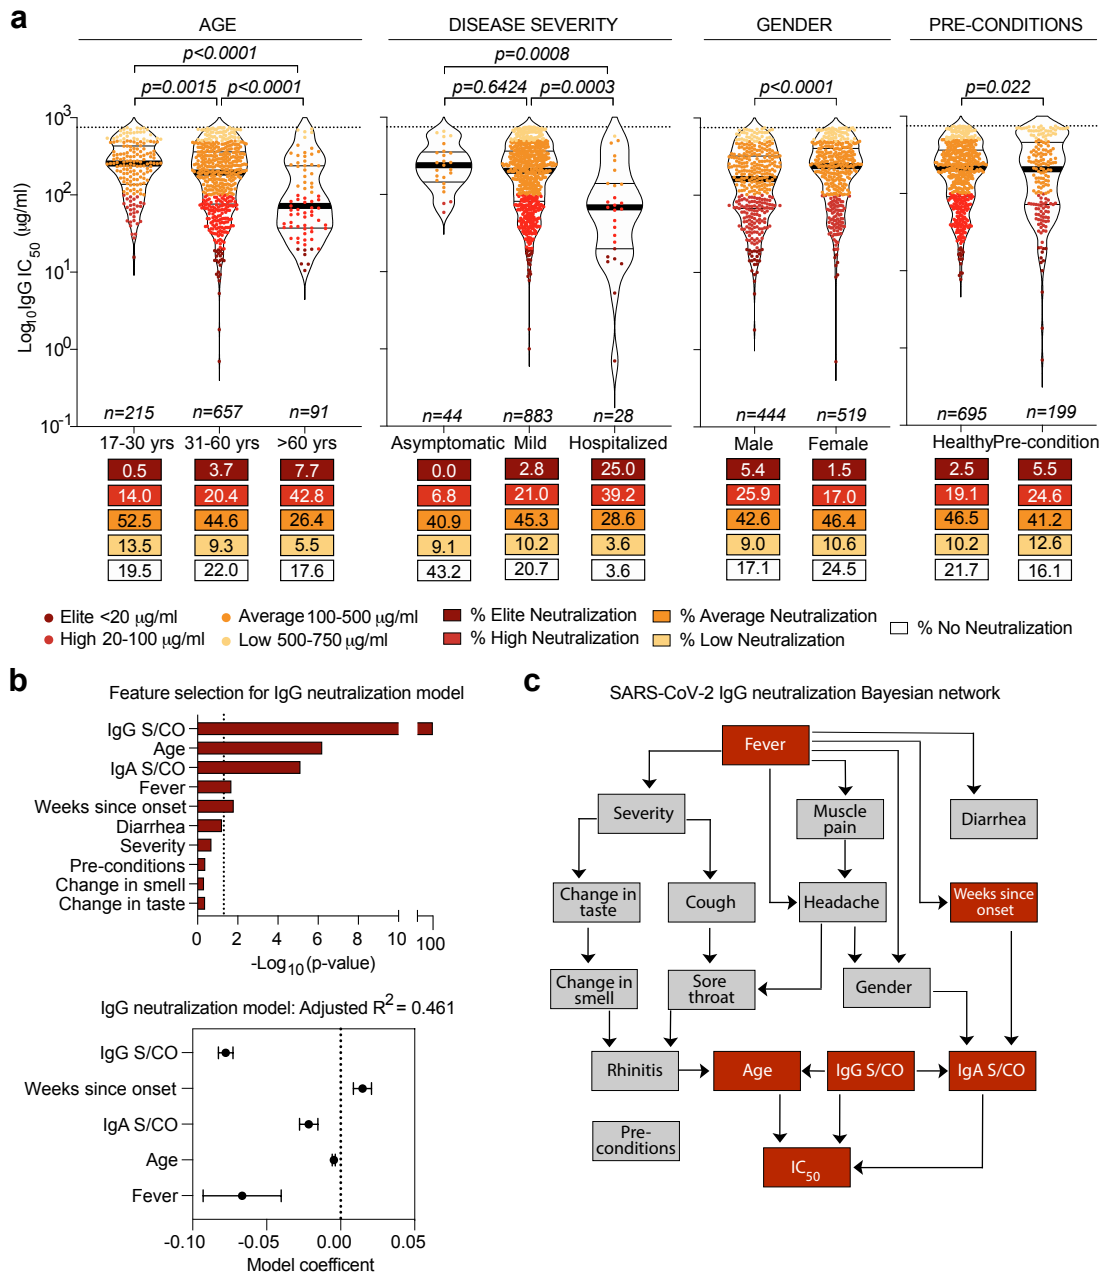

**Figure 3: Correlates of neutralizing activity against SARS-CoV-2**

**a**, violin plots depicting IgG neutralization IC<sub>50</sub> values at study visit 1 against Wu01 pseudovirus, subdivided based on age, disease severity, gender and pre-conditions. Dotted line represents the limit of detection (750 µg/ml) of the assay. Statistical analysis was performed Kruskal-Wallis and Mann-Whitney tests. **b**, multiple linear regression model for predicting IgG IC<sub>50</sub> using the features: Euroimmun S/CO, gender, age, disease severity, pre-conditions, weeks since infection and the 9 reported symptoms. Plot below depicts model coefficients to study the goodness of fit of the final IC<sub>50</sub> prediction model. **c**, Bayesian network of the features predicting IgG IC<sub>50</sub> are plotted using the bnlearn R package. The graph connects the features which are predictive of each other with IgG IC<sub>50</sub> as sink.

## Figure 4

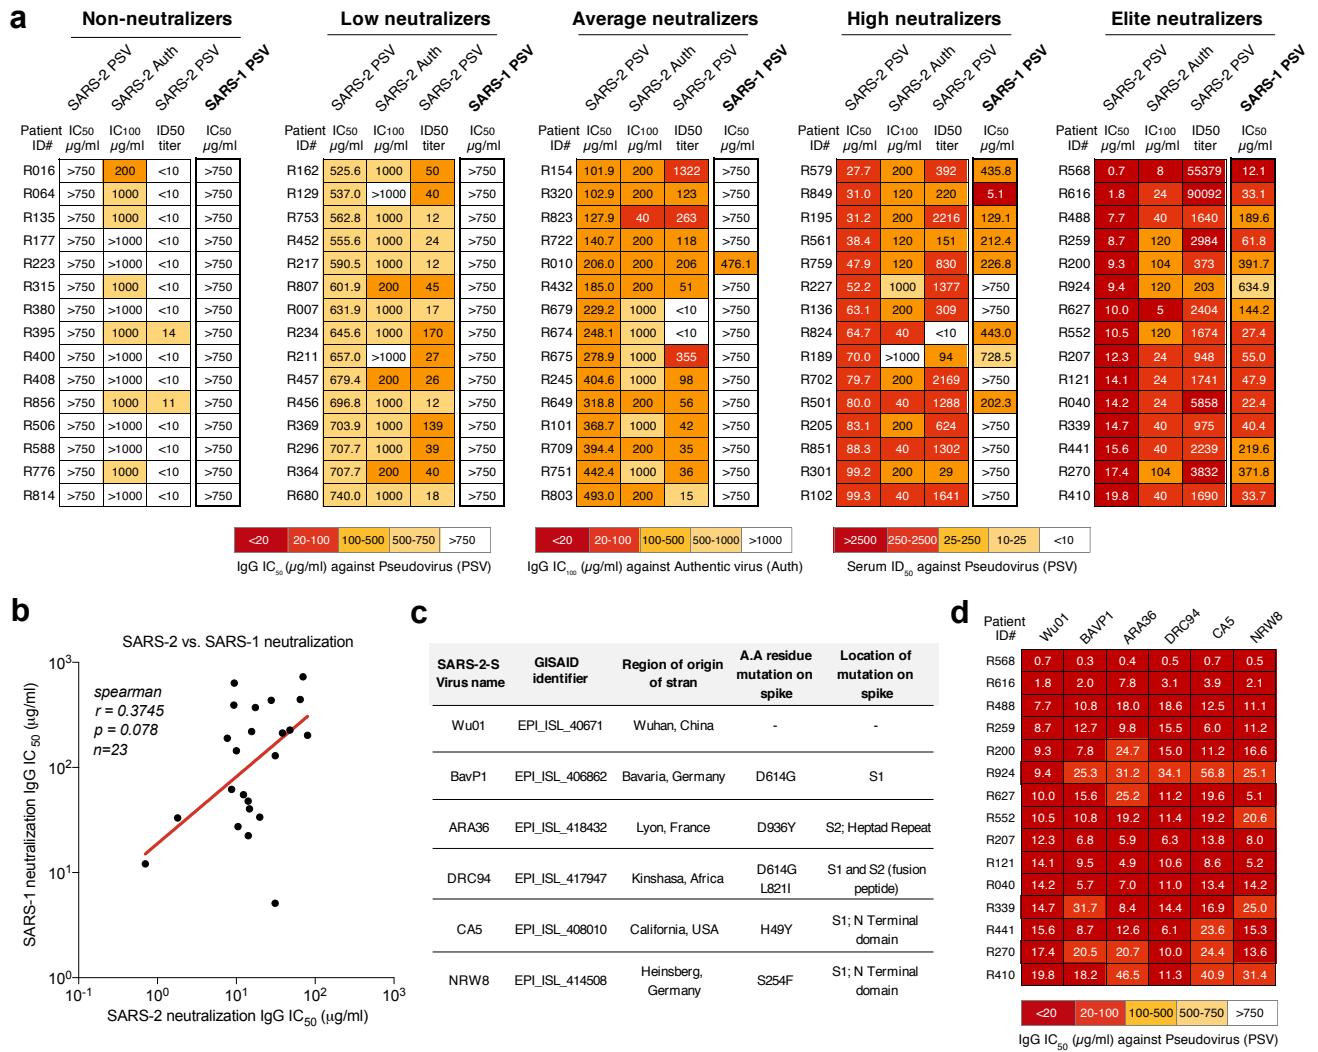



## Figure 5

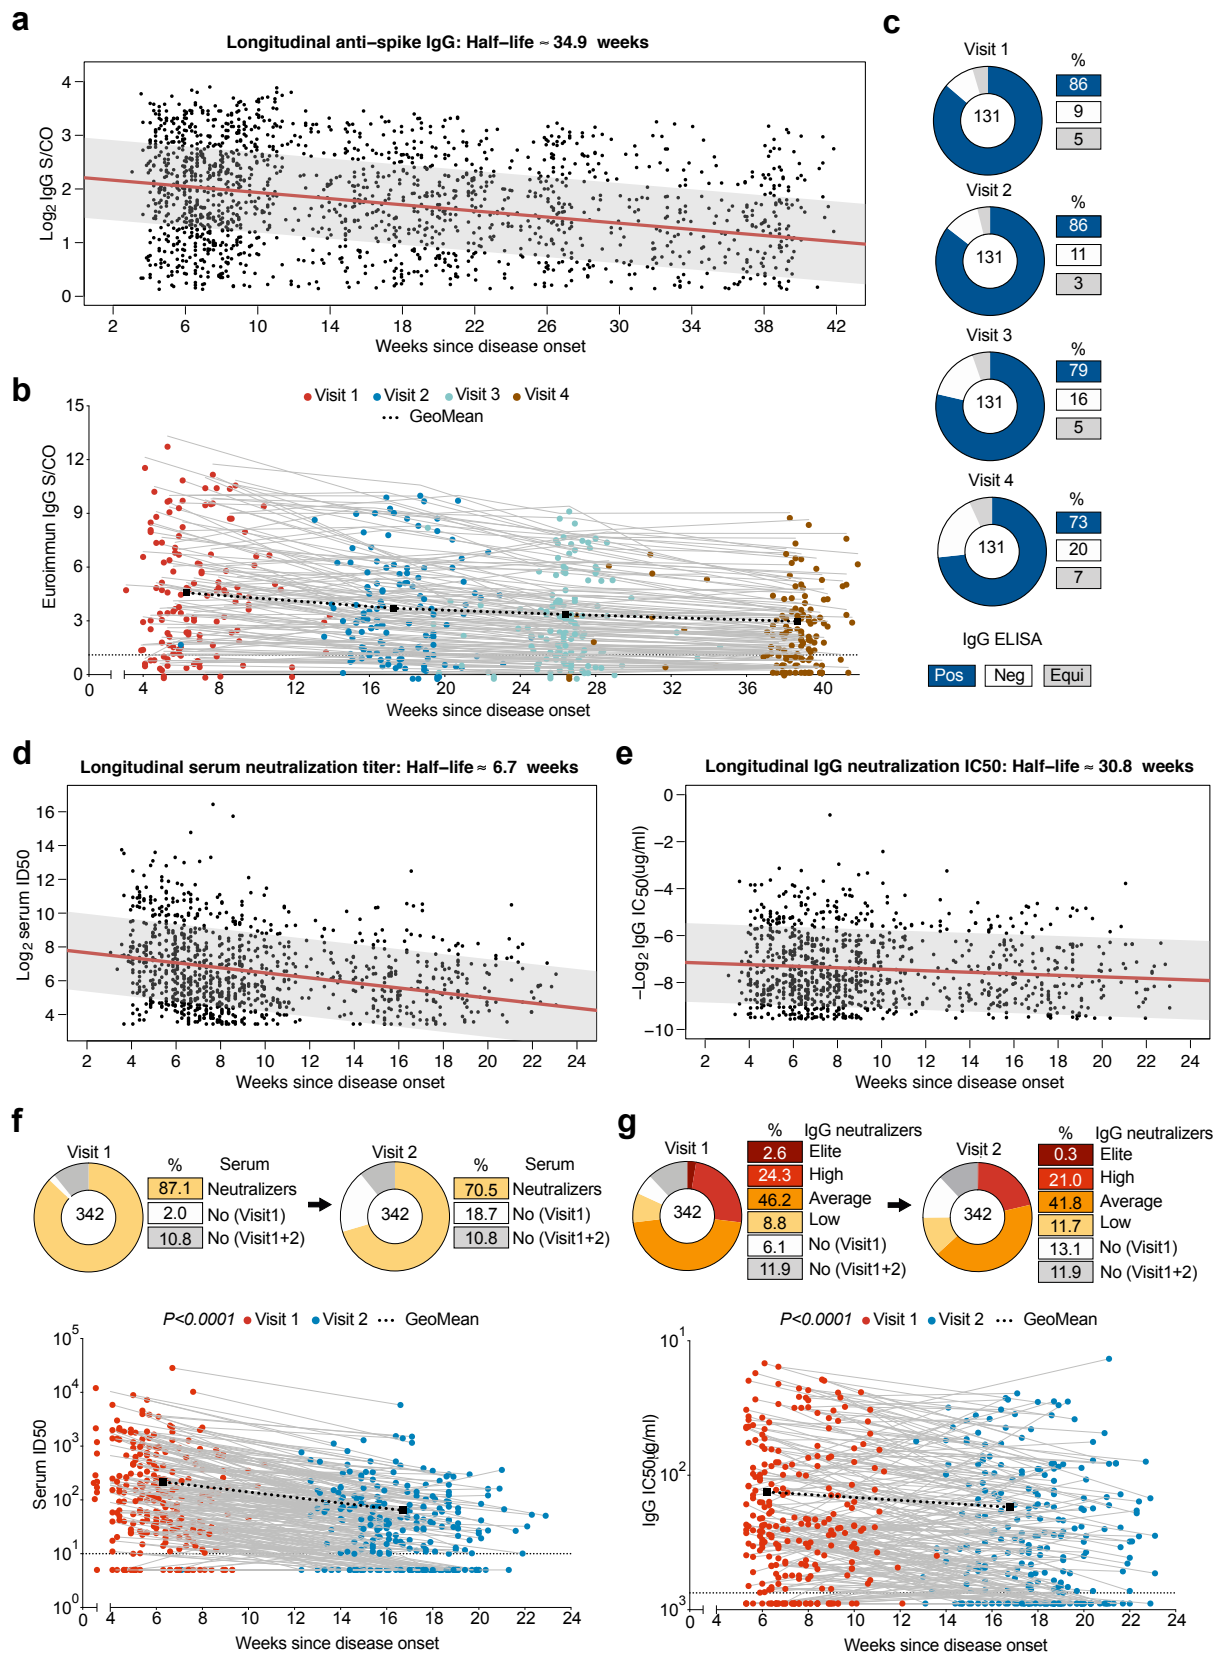

**Figure 5: Longitudinal maintenance of anti-SARS-CoV-2 IgG antibody titers**

**a**, IgG ELISA ratios ( $n=1,669$ ) plotted against weeks since infection for half-life estimate of anti-spike IgG levels using a linear mixed-effects model. **b**, longitudinal mapping of IgG levels in 131 individuals from visit 1-4. Dot plots illustrate antibody titer against the weeks since infection to study visit 1 (red) and study visit 2 (blue). Geometric mean change shown in black. Dotted lines represent limit of detection ( $S/CO=1.1$  for IgG ELISA). **c**, pie charts illustrate the change in the fraction of IgG ELISA positive (Pos), Negative (Neg) and Equivocal (Equi) samples ( $n=131$ ) between the study visits. **d**, serum ID50 values against Wu01 pseudovirus ( $n=1,017$ ) and **e**, IgG IC50 values against Wu01 pseudovirus ( $n=996$ ) plotted against weeks since infection for half-life estimate of the antibody levels using a linear mixed effects model. Longitudinal mapping of serum neutralization (**f**) and IgG neutralization (**g**) in 342 individuals at study visit 1 and 2. Serum and IgG non-neutralizers were assigned values of ID50=5 and IC50=900 for plotting. Dotted lines represent limit of detection (ID50 of 10 and IC50 of 750  $\mu\text{g/ml}$  for serum and IgG neutralization assays). Pie charts illustrate the change in the fraction of serum neutralizers (**f**) and IgG neutralizers (**g**) in the samples ( $n=342$ ) between the study visits.
